# Supplementary material
Source: publisher site journal article supplement (https://www.dovepress.com/get_supplementary_file.php?f=512018.docx)
Supplement: Supplementary file 1 [file get_supplementary_file.php]

Supplementary Table 1 The results of collinear diagnosis between each covariate in the models of SII

| **Variable** | **Tol** | **VIF** |
| --- | --- | --- |
| (constant ) |  |  |
| age | 0.657 | 1.522 |
| sex | 0.785 | 1.275 |
| heart rate | 0.588 | 1.702 |
| GCS score | 0.723 | 1.383 |
| creatinine | 0.585 | 1.710 |
| white blood cell | 0.709 | 1.411 |
| hemoglobin | 0.772 | 1.296 |
| SII | 0.535 | 1.871 |

The results showed that the VIF value of all independent variables is less than 5(all VIF ＜ 5), revealing that collinearity problems can be ignored.

Supplementary Table 2 The results of collinear diagnosis between each covariate in the models of PLR

| **Variable** | **Tol** | **VIF** |
| --- | --- | --- |
| (constant ) |  |  |
| age | 0.672 | 1.488 |
| sex | 0.786 | 1.272 |
| heart rate | 0.606 | 1.650 |
| GCS score | 0.711 | 1.407 |
| creatinine | 0.627 | 1.594 |
| white blood cell | 0.879 | 1.137 |
| hemoglobin | 0.775 | 1.290 |
| PLR | 0.688 | 1.453 |

The results showed that the VIF value of all independent variables is less than 5(all VIF ＜ 5), revealing that collinearity problems can be ignored.

Supplementary Table 3 Adjusted ORs and 95% CIs for SII levels and coagulopathy risk among TBI patients with antibiotics (n=108)

|  | **SII level(median[range])** | | | | |
| --- | --- | --- | --- | --- | --- |
|  | Q1(Lowest)  (545.92  [≤966.60]) | Q2  (1387.21[966.61 - 2011.89]) | Q3  (2340.01[2011.90 - 3096.15]) | Q4 (Highest)  (5378.72  [≥3096.16]) | P for trend |
| No. Of Coagulopathy (n,%) | 23  (82.1%) | 17  (63.0%) | 13  (48.1%) | 11  (42.3%) |  |
| Unadjusted | 1 | 0.370  (0.107,1.281) | 0.202  (0.059,0.688) | 0.159  (0.046,0.552) | 0.007 |
| Model 1 | 1 | 0.313  (0.086,1.140) | 0.193  (0.056,0.666) | 0.145  (0.041,0.520) | 0.006 |
| Model 2 | 1 | 0.435  (0.111,1.709) | 0.243  (0.064,0.913) | 0.224  (0.058,0.863) | 0.049 |
| Model 3 | 1 | 0.493  (0.111,2.182) | 0.259  (0.053,1.264) | 0.095  (0.016,0.562) | 0.009 |

Model 1 adjusted for age and sex. Model 2 additionally adjusted for heart rate, GCS sore, and covariates included in model 1. Model 3 additionally adjusted for WBC, Creatinine, Hemoglobin , and covariates included in model 1 and 2.

Supplementary Table 4 Adjusted ORs and 95% CIs for PLR levels and coagulopathy risk among TBI patients with antibiotics (n=108)

|  | **PLR level(median[range])** | | | | |
| --- | --- | --- | --- | --- | --- |
|  | Q1 (Lowest)  (67.95 [≤97.99]) | Q2  (131.18 [98.00 - 164.62]) | Q3  (205.77 [164.63 - 255.38]) | Q4 (Highest)  (314.66 [≥255.39]) | P for trend |
| No. Of Coagulopathy (n,%) | 23  (82.1%) | 20  (69.0%) | 12  (50.0%) | 9  (33.3%) |  |
| Unadjusted | 1 | 0.483  (0.139,1.681) | 0.217  (0.062,0.763) | 0.109  (0.031,0.381) | ＜0.001 |
| Model 1 | 1 | 0.491  (0.140,1.718) | 0.213  (0.060,0.752) | 0.110  (0.031,0.388) | ＜0.001 |
| Model 2 | 1 | 0.728  (0.192,2.761) | 0.345  (0.091,1.310) | 0.186  (0.049,0.705) | 0.005 |
| Model 3 | 1 | 0.861  (0.203,3.654) | 0.456  (0.103,2.012) | 0.207  (0.047,0.912) | 0.013 |

Model 1 adjusted for age and sex. Model 2 additionally adjusted for heart rate, GCS sore, and covariates included in model 1. Model 3 additionally adjusted for WBC, Creatinine, Hemoglobin , and covariates included in model 1 and 2.

Supplementary Table 5 Adjusted ORs and 95% CIs for SII levels and coagulopathy risk among TBI patients without lower limb venous thrombosis on admission (n=74)

|  | **SII level(median[range])** | | | | |
| --- | --- | --- | --- | --- | --- |
|  | Q1(Lowest)  (545.92  [≤966.60]) | Q2  (1387.21[966.61 - 2011.89]) | Q3  (2340.01[2011.90 - 3096.15]) | Q4 (Highest)  (5378.72  [≥3096.16]) | P for trend |
| No. Of Coagulopathy (n,%) | 14  (77.8%) | 14  (70.0%) | 9  (52.9%) | 8  (42.1%) |  |
| Unadjusted | 1 | 0.348  (0.100,1.213) | 0.201  (0.058,0.697) | 0.149  (0.043,0.514) | 0.005 |
| Model 1 | 1 | 0.300  (0.081,1.106) | 0.191  (0.054,0.673) | 0.136  (0.038,0.488) | 0.005 |
| Model 2 | 1 | 0.874  (0.181,4.218) | 0.440  (0.092,2.106) | 0.316  (0.064,1.549) | 0.099 |
| Model 3 | 1 | 1.133  (0.198,6.487) | 0.306  (0.047,2.000) | 0.148  (0.019,1.171) | 0.031 |
|  |  |  |  |  |  |

Model 1 adjusted for age and sex. Model 2 additionally adjusted for heart rate, GCS sore, and covariates included in model 1. Model 3 additionally adjusted for WBC, Creatinine, Hemoglobin , and covariates included in model 1 and 2.

Supplementary Table 6 Adjusted ORs and 95% CIs for PLR levels and coagulopathy risk among TBI patients without lower limb venous thrombosis on admission (n=74)

|  | **PLR level(median[range])** | | | | |
| --- | --- | --- | --- | --- | --- |
|  | Q1 (Lowest)  (67.95 [≤97.99]) | Q2  (131.18 [98.00 - 164.62]) | Q3  (205.77 [164.63 - 255.38]) | Q4 (Highest)  (314.66 [≥255.39]) | P for trend |
| No. Of Coagulopathy (n,%) | 17  (85.0%) | 11  (61.1%) | 11  (61.1%) | 6  (33.3%) |  |
| Unadjusted | 1 | 0.404  (0.107,1.519) | 0.154  (0.041,0.584) | 0.091  (0.024,0.345) | ＜0.001 |
| Model 1 | 1 | 0.409  (0.108,1.541) | 0.151  (0.040,0.577) | 0.091  (0.024,0.347) | ＜0.001 |
| Model 2 | 1 | 0.290  (0.055,1.522) | 0.348  (0.067,1.803) | 0.118  (0.022,0.619) | 0.016 |
| Model 3 | 1 | 0.275  (0.044,1.722) | 0.363  (0.061,2.167) | 0.124  (0.020,0.776) | 0.039 |

Model 1 adjusted for age and sex. Model 2 additionally adjusted for heart rate, GCS sore, and covariates included in model 1. Model 3 additionally adjusted for WBC, Creatinine, Hemoglobin , and covariates included in model 1 and 2.

Supplementary Table 7 Adjusted ORs and 95% CIs for SII levels and coagulopathy risk among TBI patients without anticoagulants (n=64)

|  | **SII level(median[range])** | | | | |
| --- | --- | --- | --- | --- | --- |
|  | Q1(Lowest)  (545.92  [≤966.60]) | Q2  (1387.21[966.61 - 2011.89]) | Q3  (2340.01[2011.90 - 3096.15]) | Q4 (Highest)  (5378.72  [≥3096.16]) | P for trend |
| No. Of Coagulopathy (n,%) | 17  (77.3%) | 7  (53.8%) | 5  (35.7%) | 7  (46.7%) |  |
| Unadjusted | 1 | 0.343  (0.078,1.504) | 0.163  (0.037,0.718) | 0.257  (0.062,1.067) | 0.099 |
| Model 1 | 1 | 0.303  (0.060,1.523) | 0.172  (0.038,0.781) | 0.273  (0.063,1.189) | 0.149 |
| Model 2 | 1 | 0.407  (0.069,2.420) | 0.160  (0.027,0.926) | 0.434  (0.086,2.184) | 0.488 |
| Model 3 | 1 | 0.444  (0.062,3.157) | 0.292  (0.036,2.351) | 0.088  (0.007,1.033) | 0.059 |

Model 1 adjusted for age and sex. Model 2 additionally adjusted for heart rate, GCS sore, and covariates included in model 1. Model 3 additionally adjusted for WBC, Creatinine, Hemoglobin , and covariates included in model 1 and 2.

Supplementary Table 8 Adjusted ORs and 95% CIs for PLR levels and coagulopathy risk among TBI patients without anticoagulants (n=64)

|  | **PLR level(median[range])** | | | | |
| --- | --- | --- | --- | --- | --- |
|  | Q1 (Lowest)  (67.95 [≤97.99]) | Q2  (131.18 [98.00 - 164.62]) | Q3  (205.77 [164.63 - 255.38]) | Q4 (Highest)  (314.66 [≥255.39]) | P for trend |
| No. Of Coagulopathy (n,%) | 14  (73.7%) | 12  (75.0%) | 4  (36.4%) | 6  (33.3%) |  |
| Unadjusted | 1 | 1.071  (0.233,4.919) | 0.204  (0.041,1.008) | 0.179  (0.043,0.735) | 0.005 |
| Model 1 | 1 | 1.163  (0.249,5.438) | 0.199  (0.039,1.012) | 0.206  (0.049,0.874) | 0.009 |
| Model 2 | 1 | 1.453  (0.279,7.553) | 0.451  (0.075,2.723) | 0.324  (0.068,1.539) | 0.073 |
| Model 3 | 1 | 1.641  (0.269,9.990) | 0.681  (0.082,5.631) | 0.227  (0.032,1.619) | 0.077 |

Model 1 adjusted for age and sex. Model 2 additionally adjusted for heart rate, GCS sore, and covariates included in model 1. Model 3 additionally adjusted for WBC, Creatinine, Hemoglobin , and covariates included in model 1 and 2.

Supplementary Table 9 Adjusted ORs and 95% CIs for SII levels and coagulopathy risk among patients with isolated TBI (n=61)

|  | **SII level(median[range])** | | | | |
| --- | --- | --- | --- | --- | --- |
|  | Q1(Lowest)  (545.92  [≤966.60]) | Q2  (1387.21[966.61 - 2011.89]) | Q3  (2340.01[2011.90 - 3096.15]) | Q4 (Highest)  (5378.72  [≥3096.16]) | P for trend |
| No. Of Coagulopathy (n,%) | 15  (46.9%) | 5  (15.6%) | 5  (15.6%) | 7  (21.9%) |  |
| Unadjusted | 1 | 0.125  (0.024,0.663) | 0.091  (0.018,0.464) | 0.200  (0.039,1.014) | 0.026 |
| Model 1 | 1 | 0.113  (0.019,0.668) | 0.095  (0.018,0.513) | 0.199  (0.036,1.104) | 0.036 |
| Model 2 | 1 | 0.125  (0.017,0.901) | 0.129  (0.020,0.825) | 0.303  (0.048,1.917) | 0.117 |
| Model 3 | 1 | 0.061  (0.006,0.665) | 0.104  (0.011,1.012) | 0.063  (0.004,0.941) | 0.116 |

Model 1 adjusted for age and sex. Model 2 additionally adjusted for heart rate, GCS sore, and covariates included in model 1. Model 3 additionally adjusted for WBC, Creatinine, Hemoglobin , and covariates included in model 1 and 2.

Supplementary Table 10 Adjusted ORs and 95% CIs for PLR levels and coagulopathy risk among patients with isolated TBI(n=61)

|  | **PLR level(median[range])** | | | | |
| --- | --- | --- | --- | --- | --- |
|  | Q1 (Lowest)  (67.95 [≤97.99]) | Q2  (131.18 [98.00 - 164.62]) | Q3  (205.77 [164.63 - 255.38]) | Q4 (Highest)  (314.66 [≥255.39]) | P for trend |
| No. Of Coagulopathy (n,%) | 13  (40.6%) | 8  (25.0%) | 4  (12.5%) | 7  (21.9%) |  |
| Unadjusted | 1 | 0.615  (0.099,3.823) | 0.084  (0.015,0.459) | 0.135  (0.028,0.643) | 0.009 |
| Model 1 | 1 | 0.639  (0.101,4.038) | 0.081  (0.015,0.454) | 0.157  (0.032,0.775) | 0.011 |
| Model 2 | 1 | 0.767  (0.094,6.274) | 0.163  (0.024,1.132) | 0.249  (0.041,1.510) | 0.170 |
| Model 3 | 1 | 1.196  (0.123,11.618) | 0.202  (0.023,1.777) | 0.287  (0.036,2.283) | 0.253 |

Model 1 adjusted for age and sex. Model 2 additionally adjusted for heart rate, GCS sore, and covariates included in model 1. Model 3 additionally adjusted for WBC, Creatinine, Hemoglobin , and covariates included in model 1 and 2.

Supplementary Table 11 Adjusted ORs and 95% CIs for SII levels and coagulopathy risk among TBI patients with multi-trauma(n=52)

|  | **SII level(median[range])** | | | | |
| --- | --- | --- | --- | --- | --- |
|  | Q1(Lowest)  (545.92  [≤966.60]) | Q2  (1387.21[966.61 - 2011.89]) | Q3  (2340.01[2011.90 - 3096.15]) | Q4 (Highest)  (5378.72  [≥3096.16]) | P for trend |
| No. Of Coagulopathy (n,%) | 8  (25.0%) | 12  (37.5%) | 8  (25.0%) | 4  (12.5%) |  |
| Unadjusted | 1 | 2.250  (0.304,16.632) | 0.600  (0.106,3.400) | 0.150  (0.026,0.874) | 0.029 |
| Model 1 | 1 | 2.187  (0.281,17.019) | 0.686  (0.103,4.586) | 0.155  (0.025,0.959) | 0.039 |
| Model 2 | 1 | 2.831  (0.288,27.790) | 0.691  (0.078,6.104) | 0.178  (0.019,1.652) | 0.071 |
| Model 3 | 1 | 6.633  (0.245,179.685) | 0.149  (0.003,6.750) | 0.001  (0.000,0.333) | 0.055 |

Model 1 adjusted for age and sex. Model 2 additionally adjusted for heart rate, GCS sore, and covariates included in model 1. Model 3 additionally adjusted for WBC, Creatinine, Hemoglobin , and covariates included in model 1 and 2.

Supplementary Table 12 Adjusted ORs and 95% CIs for PLR levels and coagulopathy risk among TBI patients with multi-trauma (n=52)

|  | **PLR level(median[range])** | | | | |
| --- | --- | --- | --- | --- | --- |
|  | Q1 (Lowest)  (67.95 [≤97.99]) | Q2  (131.18 [98.00 - 164.62]) | Q3  (205.77 [164.63 - 255.38]) | Q4 (Highest)  (314.66 [≥255.39]) | P for trend |
| No. Of Coagulopathy (n,%) | 10  (31.3%) | 12  (37.5%) | 8  (25.0%) | 2  (6.3%) |  |
| Unadjusted | 1 | 0.400  (0.066,2.437) | 0.400  (0.058,2.770) | 0.050  (0.006,0.438) | 0.046 |
| Model 1 | 1 | 0.442  (0.064,3.070) | 0.436  (0.057,3.351) | 0.045  (0.005,0.443) | 0.043 |
| Model 2 | 1 | 0.646  (0.081,5.144) | 0.534  (0.062,4.632) | 0.055  (0.004,0.664) | 0.086 |
| Model 3 | 1 | 0.611  (0.066,5.656) | 0.475  (0.037,6.091) | 0.00  (0.000,0.458) | 0.110 |

Model 1 adjusted for age and sex. Model 2 additionally adjusted for heart rate, GCS sore, and covariates included in model 1. Model 3 additionally adjusted for WBC, Creatinine, Hemoglobin , and covariates included in model 1 and 2.

Supplementary Table 13 Baseline characteristics of 98 patients according to GOS score(n=98)

| **Variable** | **ALL patients**  (N=113) | **GOS≤3**  (N=52) | **GOS＞3**  (N=46) | **P-value** |
| --- | --- | --- | --- | --- |
| Age (years,mean±SD) | 49.12±18.86 | 52.98±18.79 | 44.78±17.66 | 0.029 |
| Sex(males,n,%) | 75(76.5%) | 38(73.1%) | 37(80.4%) | 0.391 |
| Heart rate [M(IQR)] | 90.60±20.83 | 98.02±22.52 | 85.02±16.56 | 0.002 |
| Blood pressure (mmHg) [M(IQR)] |  |  |  |  |
| Systolic pressure | 126.21±26.33 | 126.02±28.83 | 124.024±18.40 | 0.786 |
| Diastolic pressure | 78.13±19.99 | 77.14±22.03 | 77.36±14.67 | 0.817 |
| Temperature(℃) [M(IQR)] | 36.79±0.80 | 36.67±0.79 | 36.95±0.83 | 0.140 |
| Time to hospital after injury (h) [M(IQR)] | 5.00  (2.00,22.00) | 7.50  (2.00,24.00) | 5.000  (2.75,24.00) | 0.834 |
| AIS score  [M(IQR)] | 4.00  (3.00,5.00) | 5.00  (4.00,5.00) | 3.00  (3.00,4.00) | ＜0.001 |
| GCS score  [M(IQR)] | 7.50  (4.00,12.00) | 4.00  (3.00,7.00) | 11.00  (8.00,12.00) | ＜0.001 |
| Abnormal Pupillary reflex (n,%) | 60(61.22%) | 41(78.8%) | 19(41.3%) | ＜0.001 |
| Blunt injury(n,%) | 96(98.0%) | 52(100.0%) | 44(95.7%) | 0.422 |
| Mortality in hospital (n,%) | 22(22.4%) | 22(42.3%) | 0(0.0%) | ＜0.001 |
| Coagulation (n,%) | 55(56.1%) | 38(73.1%) | 17(37.0%) | ＜0.001 |
| ICU/EICU LOS  (d) [M(IQR)] | 10.00  (4.00,19.50) | 14.50  (7.75,24.25) | 8.50  (4.75,15.25) | 0.013 |
| Respirator LOS  (d) [M(IQR)] | 3.00  (0.00,9.00) | 9.00  (4.00,18.00) | 0.00  (0.00,5.00) | ＜0.001 |
| Total LOS(d,mean±SD) | 18.00  (10.00,30.00) | 19.00  (8.00,30.50) | 21.00  (15.75,34.00) | 0.115 |
| Antibiotic usage(n,%) | 94(95.9%) | 52(100.0%) | 42(91.3%) | 0.097 |
| Anticoagulant usage(n,%) | 44(44.9%) | 26(50.0%) | 18(39.1%) | 0.280 |
| **Laboratory findings** | |  |  |  |
| Creatinine [M(IQR)] | 78.50  (64.25,100.75) | 87.00  (64.75,120.75) | 73.50  (64.50,86.00) | 0.029 |
| Hemoglobin (mean±SD) | 104.68±26.04 | 91.21±26.051 | 116.76±20.78 | ＜0.001 |
| C-reactive protein [M(IQR)] | 29.20  (5.74,88.35) | 31.74  (7.61,113.88) | 31.57  (4.66,85.57) | 0.726 |
| Neutrophile [M(IQR)] | 10.66  (8.14,14.00) | 10.66  (8.62,12.82) | 10.64  (8.23,15.34) | 0.576 |
| White blood cell [M(IQR)] | 12.74  (9.77,16.72) | 12.82  (9.79,15.62) | 12.72  (10.04,16.82) | 0.550 |
| SII[M(IQR)] | 1799.65  (858.90,3317.91) | 1116.73  (486.53,2342.04) | 2060.24  (1185.02,4125.97) | 0.008 |
| PLR[M(IQR)] | 177.46  (90.62,271.52) | 113.14  (55.01,212.64) | 217.91  (120.06,278.50) | 0.001 |

Abbreviations: AIS score = head acute injury scale score , GCS score=Glasgow Coma Scale score, GOS score = Glasgow Outcome Scale score, IQR = interquartile range, LOS = length of stay, SII= platelet count×neutrophil count / lymphocyte count) , PLR = platelet-to-lymphocyte ratio.

Supplementary Table 14 Adjusted ORs and 95% CIs for SII levels and prognosis at 6 months after discharge (n = 98)

|  | **SII level(median[range])** | | | | |
| --- | --- | --- | --- | --- | --- |
|  | Q1 (Lowest)  (545.92  [≤966.60]) | Q2  (1387.21[966.61 - 2011.89]) | Q3  (2340.01[2011.90 - 3096.15]) | Q4 (Highest)  (5378.72  [≥3096.16]) | P for trend |
| No. of  GOS ≤ 3(n,%) | 20(74.1%) | 11(45.8%) | 14(60.9%) | 7(29.2%) |  |
| Unadjusted | 1 | 3.377  (1.041,10.957) | 1.837  (0.553,6.103) | 6.939  (2.026,23.765) | 0.014 |
| Model 1 | 1 | 2.604  (0.765,8.864) | 1.890  (0.556,6.425) | 7.132  (1.981,25.677) | 0.024 |
| Model 2 | 1 | 0.805  (0.135,4.801) | 0.406  (0.067,2.466) | 2.545  (0.438,14.778) | 0.297 |
| Model 3 | 1 | 0.612  (0.077,4.855) | 0.164  (0.016,1.632) | 1.506  (0.184,12.337) | 0.208 |

Model 1 adjusted for age and sex. Model 2 additionally adjusted for heart rate, GCS sore, and covariates included in model 1. Model 3 additionally adjusted for WBC, Creatinine, Hemoglobin , and covariates included in model 1 and 2.

Supplementary Table 15 Adjusted ORs and 95% CIs for PLR levels and prognosis at 6 months after discharge (n = 98)

|  | **PLR level(median[range])** | | | | | |
| --- | --- | --- | --- | --- | --- | --- |
|  | Q1 (Lowest)  (67.95 [≤97.99]) | Q2  (131.18 [98.00 - 164.62]) | | Q3  (205.77 [164.63 - 255.38]) | Q4 (Highest)  (314.66 [≥255.39]) | P for trend |
| No. of  GOS ≤ 3(n,%) | 19(73.1%) | | 16(66.7%) | 10(41.7%) | 7(29.2%) |  |
| Unadjusted | 1 | | 1.357  (0.404,4.565) | 3.800  (1.159,12.456) | 6.592  (1.917,22.670) | 0.008 |
| Model 1 | 1 | | 1.528  (0.433,5.388) | 4.205  (1.215,14.552) | 9.012  (2.353,34.514) | 0.005 |
| Model 2 | 1 | | 0.346  (0.049,2.430) | 0.597  (0.099,3.578) | 1.834  (0.281,11.969) | 0.420 |
| Model 3 | 1 | | 0.223  (0.024,2.064) | 0.343  (0.045,2.627) | 1.449  (0.213,9.875) | 0.335 |

Model 1 adjusted for age and sex. Model 2 additionally adjusted for heart rate, GCS sore, and covariates included in model 1. Model 3 additionally adjusted for WBC, Creatinine, Hemoglobin , and covariates included in model 1 and 2.

Supplementary Figure 1 ROC curves of SII for predicting coagulopathy risk in isolated TBI patients(A). ROC curves of PLR for predicting coagulopathy risk in isolated TBI patients(B). ROC curves of SII for predicting poor prognosis at 6 months after discharge in isolated TBI patients(C). ROC curves of PLR for predicting poor prognosis at 6 months after discharge in isolated TBI patients(D).


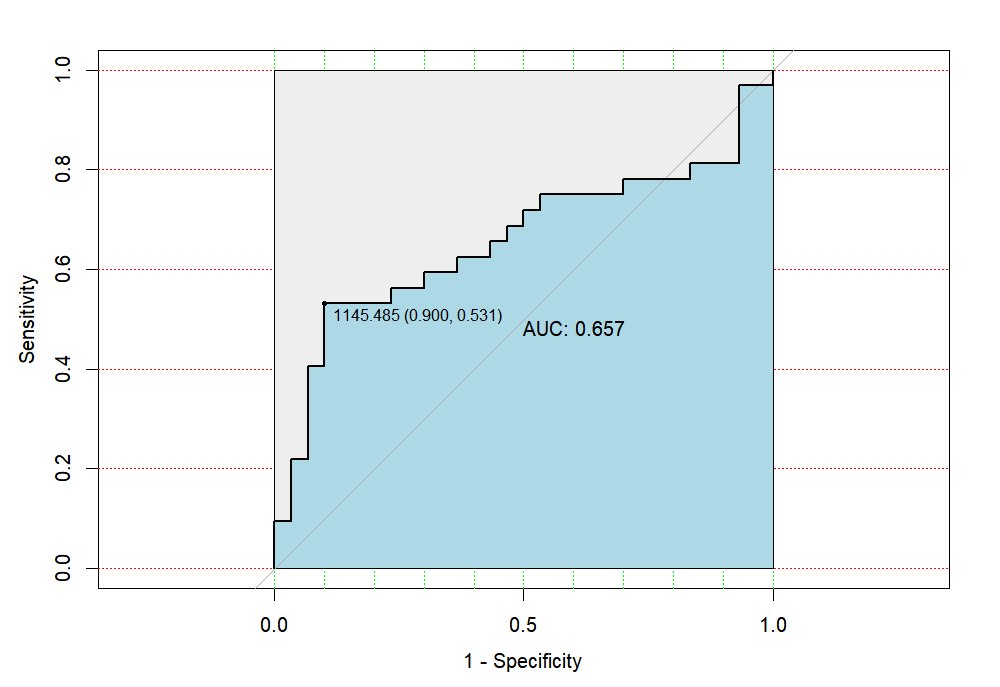

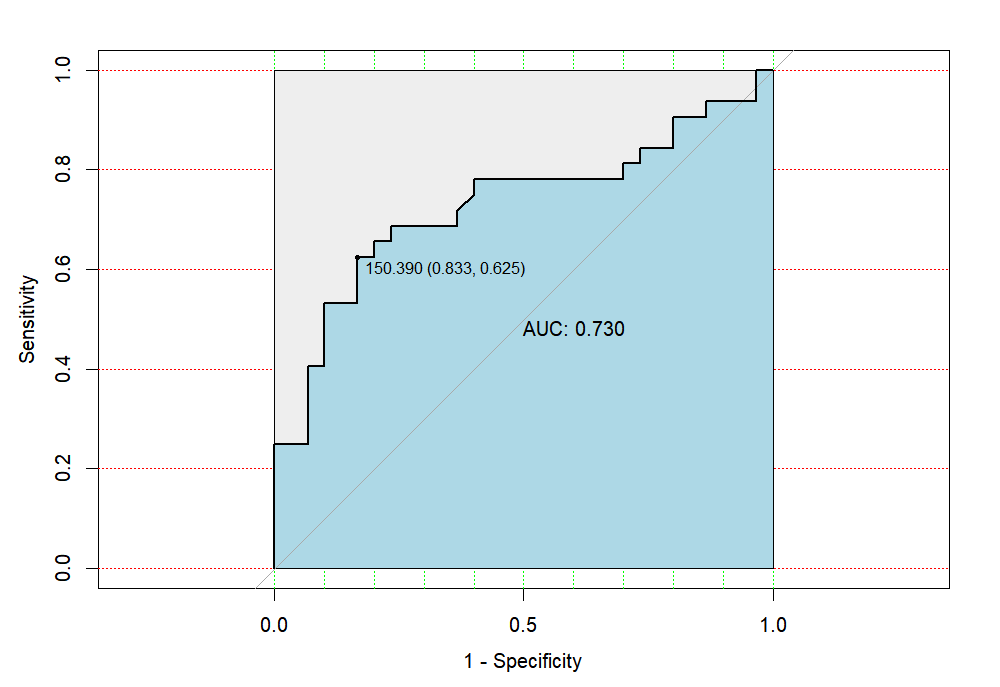


B

A


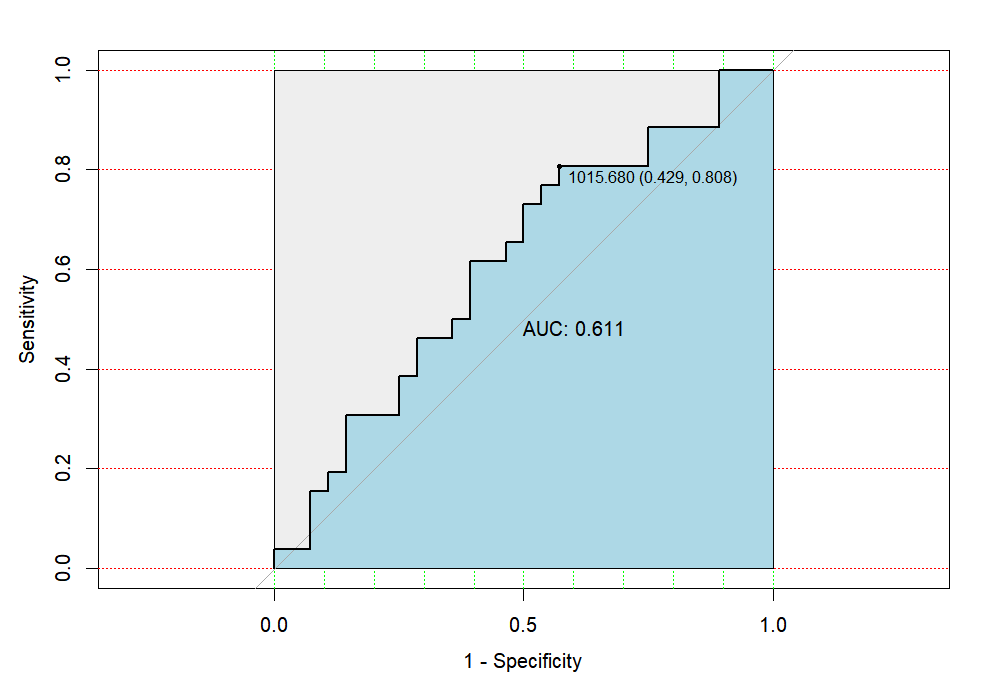


C


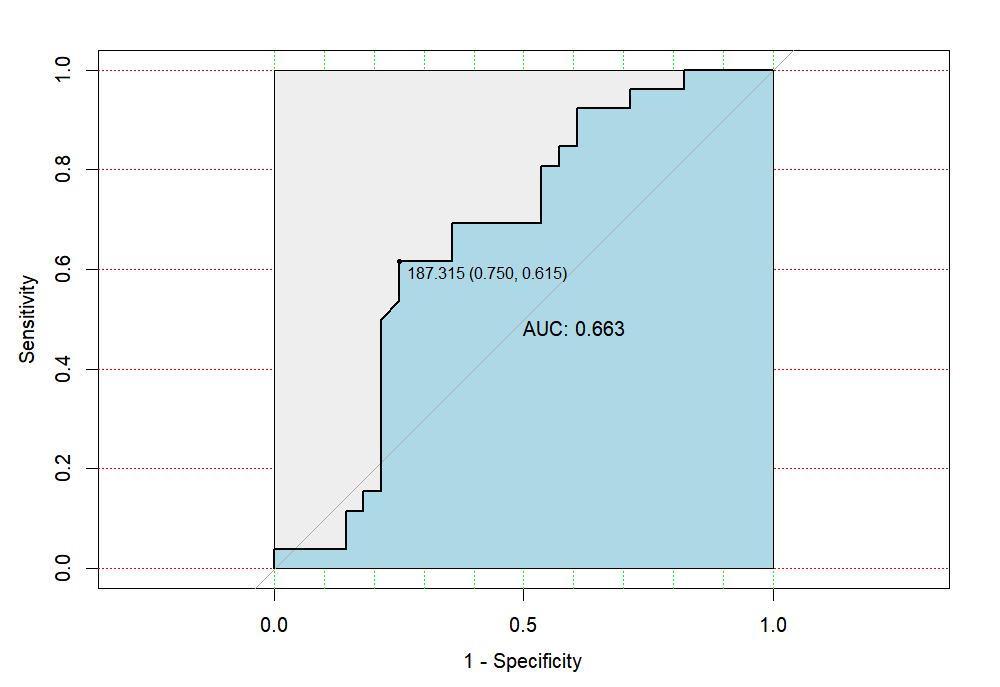


D

Supplementary Figure 2 ROC curves of SII for predicting coagulopathy risk in TBI patients with multi-trauma(A). ROC curves of PLR for predicting coagulopathy risk in TBI patients with multi-trauma(B). ROC curves of SII for predicting poor prognosis at 6 months after discharge in TBI patients with multi-trauma(C). ROC curves of PLR for predicting poor prognosis at 6 months after discharge in TBI patients with multi-trauma(D).


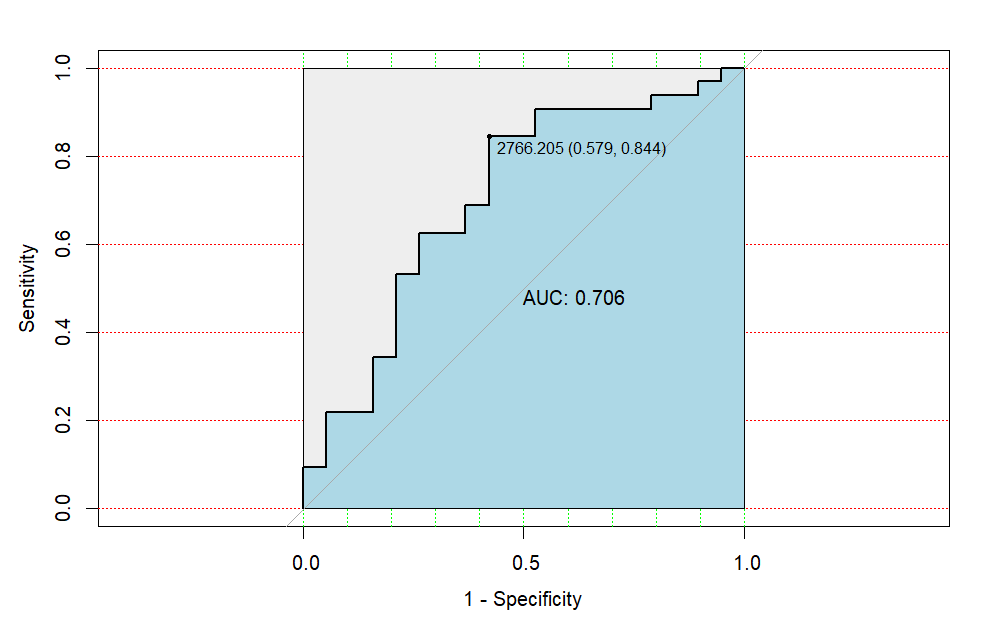

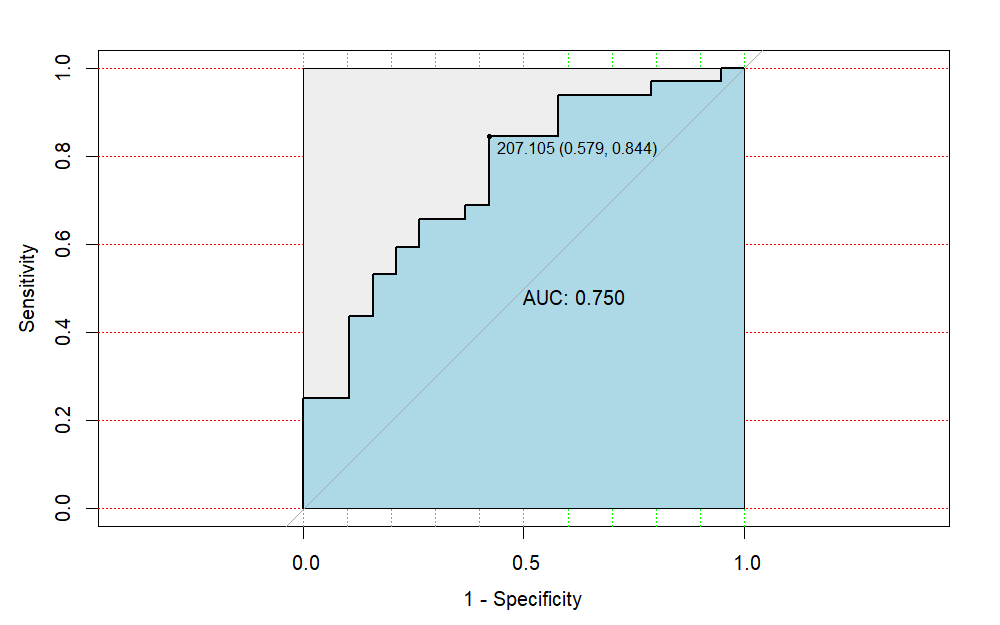


B

A


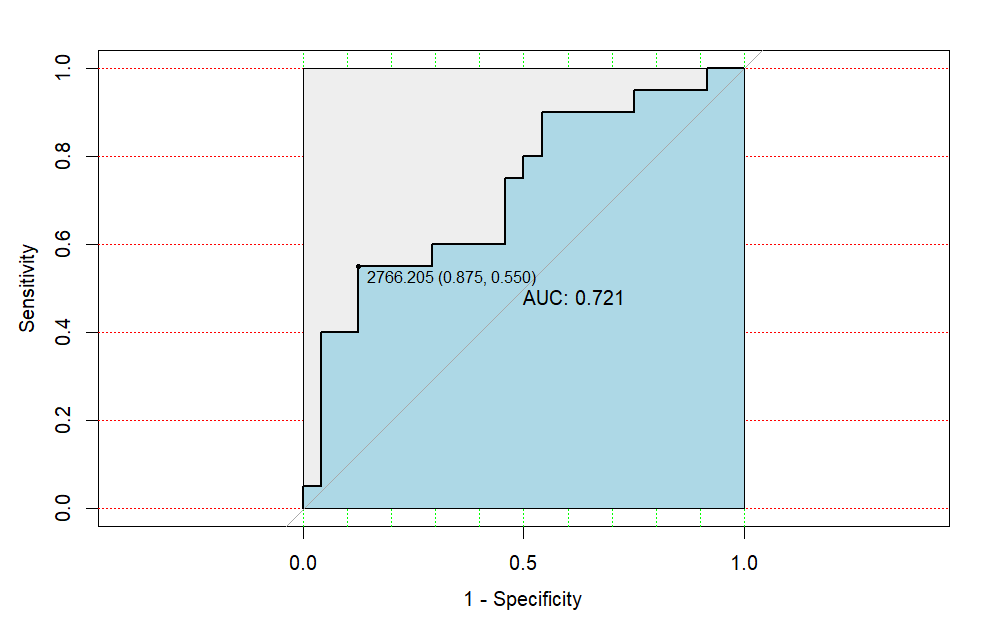


C


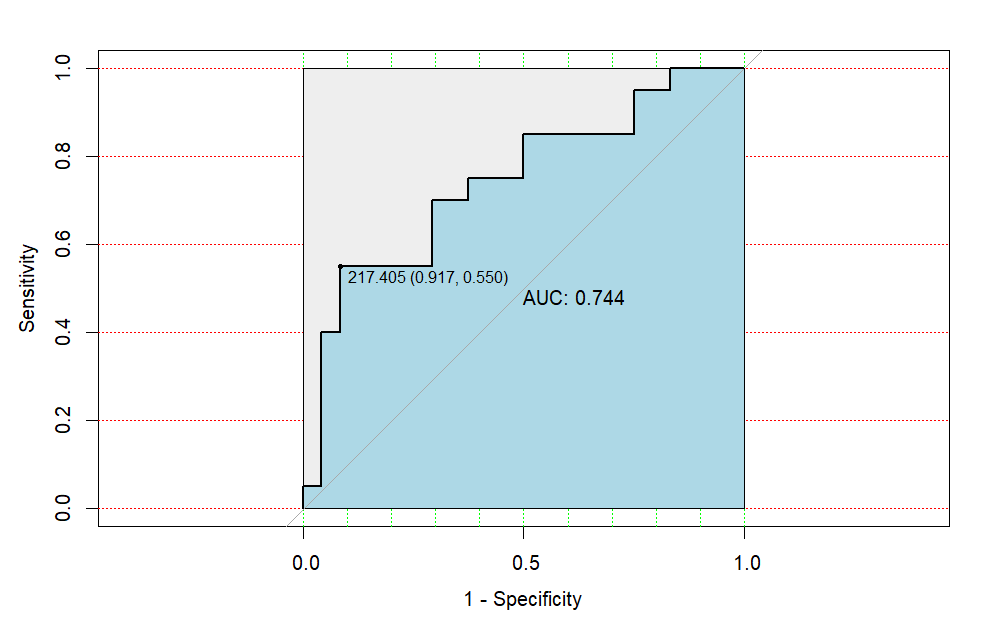


D
